# Supplementary material
Source: MDPI journal article supplement (https://www.mdpi.com/2073-4395/12/4/970)
Supplement: s1 [file s1]

Supplementary material

Table S1. Indicators scores byDMPs.

| Component                                    | Criteria                                                                                                                   | Explanation | DMP  |      |      |      |      |      |      |      |           |           | Scores |            |      |  |  |
|----------------------------------------------|----------------------------------------------------------------------------------------------------------------------------|-------------|------|------|------|------|------|------|------|------|-----------|-----------|--------|------------|------|--|--|
|                                              |                                                                                                                            |             | DOU  | TAG  | GUA  | SEG  | EBR  | GDQ  | JUC  | MIN  | Min Score | Max score | STDev  | Mean score | %    |  |  |
| Component 1. Drought hazard characterization |                                                                                                                            |             | 3,06 | 2,19 | 2,81 | 3,12 | 2,96 | 2,11 | 3,18 | 2,44 | 2,11      | 3,18      | 0,43   | 2,73       | 68%  |  |  |
| 1.1                                          | Understand drought problem                                                                                                 | Mean        | 3,33 | 3,00 | 3,00 | 3,00 | 3,00 | 3,00 | 3,00 | 3,33 | 3,00      | 3,33      | 0,15   | 3,08       | 77%  |  |  |
| 1.1.1                                        | Defines drought & drought typologies                                                                                       | 1-4         | 2    | 2    | 2    | 2    | 2    | 2    | 2    | 2    | 2,00      | 2,00      | 0,00   | 2,00       | 50%  |  |  |
| 1.1.2                                        | Definition of prolonged droughts                                                                                           | 1-4         | 4    | 4    | 4    | 4    | 4    | 4    | 4    | 4    | 4,00      | 4,00      | 0,00   | 4,00       | 100% |  |  |
| 1.1.3                                        | Relation with other similar terms (water scarcity, aridity, desertification)                                               | 1-4         | 4    | 3    | 3    | 3    | 3    | 3    | 3    | 4    | 3,00      | 4,00      | 0,46   | 3,25       | 81%  |  |  |
| 1.2                                          | Identification & assessment of past drought episodes                                                                       | Mean        | 3,92 | 3,00 | 3,58 | 3,92 | 3,83 | 2,33 | 3,83 | 3,42 | 2,33      | 3,92      | 0,56   | 3,48       | 87%  |  |  |
| 1.2.1                                        | Identification of key drought episodes                                                                                     | 1-4         | 4    | 3    | 4    | 4    | 4    | 3    | 4    | 4    | 3,00      | 4,00      | 0,46   | 3,75       | 94%  |  |  |
| 1.2.2                                        | Number of episodes assessed                                                                                                | 1-4         | 4    | 4    | 4    | 4    | 4    | 2    | 4    | 4    | 2,00      | 4,00      | 0,71   | 3,75       | 94%  |  |  |
| 1.2.3                                        | Level of detail of the assessment                                                                                          | Mean        | 3,75 | 2    | 2,75 | 3,75 | 3,5  | 2,00 | 3,5  | 2,25 | 2,00      | 3,75      | 0,78   | 2,94       | 73%  |  |  |
|                                              | General description of the event                                                                                           | 1-4         | 4    | 3    | 3    | 4    | 4    | 2    | 4    | 3    | 2,00      | 4,00      | 0,74   | 3,38       | 84%  |  |  |
|                                              | Analysis of past impacts                                                                                                   | 1-4         | 4    | 2    | 3    | 4    | 3    | 2    | 4    | 2    | 2,00      | 4,00      | 0,93   | 3,00       | 75%  |  |  |
|                                              | Analysis of past measures any/or measures                                                                                  | 1-4         | 4    | 2    | 3    | 4    | 4    | 2    | 3    | 3    | 2,00      | 4,00      | 0,83   | 3,13       | 78%  |  |  |
|                                              | Economic cost/ assessment                                                                                                  | 1-4         | 3    | 1    | 2    | 3    | 3    | 2    | 3    | 1    | 1,00      | 3,00      | 0,89   | 2,25       | 56%  |  |  |
| 1.3.                                         | Analysis of causes of drought, water deficits or unsatisfied demands                                                       | Mean        | 2,67 | 1,67 | 3,00 | 3,33 | 2,00 | 1,67 | 2,67 | 1,67 | 1,67      | 3,33      | 0,67   | 2,33       | 58%  |  |  |
| 1.3.1                                        | Identification of drought causes                                                                                           | 1-4         | 4    | 2    | 3    | 4    | 2    | 2    | 4    | 1    | 1,00      | 4,00      | 1,16   | 2,75       | 69%  |  |  |
| 1.3.2                                        | References to climate change                                                                                               | 1-4         | 2    | 2    | 2    | 2    | 2    | 2    | 2    | 2    | 2,00      | 2,00      | 0,00   | 2,00       | 50%  |  |  |
| 1.3.3                                        | Identification of cause-effect relationship                                                                                | 1-4         | 2    | 1    | 4    | 4    | 2    | 1    | 2    | 2    | 1,00      | 4,00      | 1,16   | 2,25       | 56%  |  |  |
| 1.4                                          | Analysis of Drought impacts                                                                                                | Mean        | 2,33 | 1,11 | 1,67 | 2,22 | 3,00 | 1,44 | 3,22 | 1,33 | 1,11      | 3,22      | 0,78   | 2,04       | 51%  |  |  |
| 1.4.1                                        | Identification of type of impacts (social, economical, environmental)                                                      | Mean        | 3    | 1,33 | 3,00 | 3,67 | 3,00 | 1,33 | 3,67 | 2,00 | 1,33      | 3,67      | 0,95   | 2,63       | 66%  |  |  |
|                                              | social                                                                                                                     | 1-4         | 3    | 1    | 3    | 4    | 3    | 1    | 3    | 2    | 1,00      | 4,00      | 1,07   | 2,50       | 63%  |  |  |
|                                              | economic                                                                                                                   | 1-4         | 3    | 1    | 3    | 4    | 3    | 1    | 4    | 1    | 1,00      | 4,00      | 1,31   | 2,50       | 63%  |  |  |
|                                              | environmental                                                                                                              | 1-4         | 3    | 2    | 3    | 3    | 3    | 2    | 4    | 3    | 2,00      | 4,00      | 0,64   | 2,88       | 72%  |  |  |
| 1.4.2                                        | Identification of impacts by sectors                                                                                       | 1-4         | 2    | 1    | 1    | 1    | 4    | 1    | 4    | 1    | 1,00      | 4,00      | 1,36   | 1,88       | 47%  |  |  |
| 1.4.3                                        | Quantification of drought impacts                                                                                          | 1-4         | 2    | 1    | 1    | 2    | 2    | 2    | 2    | 1    | 1,00      | 2,00      | 0,52   | 1,63       | 41%  |  |  |
| Drought Vulnerability                        |                                                                                                                            |             | 3,65 | 3,46 | 3,44 | 3,44 | 3,65 | 3,50 | 3,65 | 3,50 | 3,44      | 3,65      | 0,10   | 3,53       | 88%  |  |  |
| 2.1                                          | Analysis of water resources                                                                                                | Mean        | 3,33 | 3,33 | 3,00 | 3,00 | 3,33 | 3,00 | 3,33 | 3,00 | 3,00      | 3,33      | 0,18   | 3,17       | 79%  |  |  |
| 2.1.1                                        | Assessment of available water resources                                                                                    | Mean        | 4,00 | 4,00 | 4,00 | 4,00 | 4,00 | 4,00 | 4,00 | 4,00 | 4,00      | 4,00      | 0,00   | 4,00       | 100% |  |  |
|                                              | Assessment of surface resources                                                                                            | 1-4         | 4    | 4    | 4    | 4    | 4    | 4    | 4    | 4    | 4,00      | 4,00      | 0,00   | 4,00       | 100% |  |  |
|                                              | Assessment of groundwater resources                                                                                        | 1-4         | 4    | 4    | 4    | 4    | 4    | 4    | 4    | 4    | 4,00      | 4,00      | 0,00   | 4,00       | 100% |  |  |
|                                              | Assessment of non-conventional resources (transfers, reuse, identification by areas or geographical references or systems) | 1-4         | 4    | 4    | 4    | 4    | 4    | 4    | 4    | 4    | 4,00      | 4,00      | 0,00   | 4,00       | 100% |  |  |
| 2.1.2                                        | Analysis of Water quality                                                                                                  | 1-4         | 3    | 3    | 2    | 2    | 3    | 2    | 3    | 2    | 2,00      | 3,00      | 0,53   | 2,50       | 63%  |  |  |
| 2.1.3                                        | Assessment of environmental elements related to water resources                                                            | 1-4         | 3    | 3    | 3    | 3    | 3    | 3    | 3    | 3    | 3,00      | 3,00      | 0,00   | 3,00       | 75%  |  |  |
| 2.2                                          | Analysis of water demands and uses                                                                                         | Mean        | 4,00 | 4,00 | 4,00 | 4,00 | 4,00 | 4,00 | 4,00 | 4,00 | 4,00      | 4,00      | 0,00   | 4,00       | 100% |  |  |
| 2.2.1                                        | Analysis of Urban supply                                                                                                   | 1-4         | 4    | 4    | 4    | 4    | 4    | 4    | 4    | 4    | 4,00      | 4,00      | 0,00   | 4,00       | 100% |  |  |
| 2.2.2                                        | Analysis of Agricultural demand                                                                                            | 1-4         | 4    | 4    | 4    | 4    | 4    | 4    | 4    | 4    | 4,00      | 4,00      | 0,00   | 4,00       | 100% |  |  |
| 2.2.3                                        | Analysis of industry any/or                                                                                                | 1-4         | 4    | 4    | 4    | 4    | 4    | 4    | 4    | 4    | 4,00      | 4,00      | 0,00   | 4,00       | 100% |  |  |
| 2.2.4                                        | Analysis of other demands (tourism, recreation)                                                                            | 1-4         | 4    | 4    | 4    | 4    | 4    | 4    | 4    | 4    | 4,00      | 4,00      | 0,00   | 4,00       | 100% |  |  |
| 2.2.5                                        | Analysis of Ecological demands / Flows                                                                                     | 1-4         | 4    | 4    | 4    | 4    | 4    | 4    | 4    | 4    | 4,00      | 4,00      | 0,00   | 4,00       | 100% |  |  |
| 2.2.6                                        | Identification by areas or geographical references or systems                                                              | 1-4         | 4    | 4    | 4    | 4    | 4    | 4    | 4    | 4    | 4,00      | 4,00      | 0,00   | 4,00       | 100% |  |  |
| 2.3                                          | Analysis of vulnerability factors                                                                                          | Mean        | 3,25 | 2,50 | 2,75 | 2,75 | 3,25 | 3,00 | 3,25 | 3,00 | 2,50      | 3,25      | 0,28   | 2,97       | 74%  |  |  |
| 2.3.1                                        | Hydraulic basins or other                                                                                                  | 1-4         | 4    | 4    | 4    | 4    | 4    | 4    | 4    | 4    | 4,00      | 4,00      | 0,00   | 4,00       | 100% |  |  |
| 2.3.2                                        | Identification of vulnerable zones, natural resources                                                                      | 1-4         | 4    | 4    | 3    | 4    | 4    | 3    | 4    | 3    | 3,00      | 4,00      | 0,52   | 3,63       | 91%  |  |  |
| 2.3.3                                        | Identification of vulnerability factors                                                                                    | 1-4         | 1    | 1    | 1    | 1    | 1    | 1    | 1    | 1    | 1,00      | 1,00      | 0,00   | 1,00       | 25%  |  |  |
| 2.3.4                                        | Identification of measures or actions to reduce vulnerability                                                              | 1-4         | 4    | 1    | 3    | 2    | 4    | 4    | 4    | 4    | 1,00      | 4,00      | 1,16   | 3,25       | 81%  |  |  |
| 2.4                                          | Indicators and Drought Declaration                                                                                         | Mean        | 4,00 | 4,00 | 4,00 | 4,00 | 4,00 | 4,00 | 4,00 | 4,00 | 4,00      | 4,00      | 0,00   | 4,00       | 100% |  |  |
| 2.4.1                                        | Identification of indicators                                                                                               | 1-4         | 4    | 4    | 4    | 4    | 4    | 4    | 4    | 4    | 4,00      | 4,00      | 0,00   | 4,00       | 100% |  |  |
| 2.4.2                                        | Indicators establishment & calculation                                                                                     | Mean        | 4,00 | 4,00 | 4,00 | 4,00 | 4,00 | 4,00 | 4,00 | 4,00 | 4,00      | 4,00      | 0,00   | 4,00       | 100% |  |  |
|                                              | Zonification                                                                                                               | 1-4         | 4    | 4    | 4    | 4    | 4    | 4    | 4    | 4    | 4,00      | 4,00      | 0,00   | 4,00       | 100% |  |  |
|                                              | Threshold calculation                                                                                                      | 1-4         | 4    | 4    | 4    | 4    | 4    | 4    | 4    | 4    | 4,00      | 4,00      | 0,00   | 4,00       | 100% |  |  |
| 2.4.3                                        | Relationship among drought indicators                                                                                      | 1-4         | 4    | 4    | 4    | 4    | 4    | 4    | 4    | 4    | 4,00      | 4,00      | 0,00   | 4,00       | 100% |  |  |
| 2.4.4                                        | Process of drought phase declaration                                                                                       | 1-4         | 4    | 4    | 4    | 4    | 4    | 4    | 4    | 4    | 4,00      | 4,00      | 0,00   | 4,00       | 100% |  |  |
| Drought Measures and management              |                                                                                                                            |             | 2,86 | 2,86 | 2,86 | 2,86 | 2,86 | 2,86 | 2,86 | 2,86 | 2,86      | 2,86      | 0,00   | 2,86       | 72%  |  |  |
| 3.1                                          | Analysis of drought measures                                                                                               | Mean        | 2,42 | 2,42 | 2,42 | 2,42 | 2,42 | 2,42 | 2,42 | 2,42 | 2,42      | 2,42      | 0,00   | 2,42       | 60%  |  |  |
| 3.1.1                                        | Drought measures identification                                                                                            | Mean        | 2,50 | 2,50 | 2,50 | 2,50 | 2,50 | 2,50 | 2,50 | 2,50 | 2,50      | 2,50      | 0,00   | 2,50       | 63%  |  |  |
|                                              | Criteria for selection                                                                                                     | 1-4         | 1    | 1    | 1    | 1    | 1    | 1    | 1    | 1    | 1,00      | 1,00      | 0,00   | 1,00       | 25%  |  |  |
|                                              | Analysis of alternatives                                                                                                   | 1-4         | 4    | 4    | 4    | 4    | 4    | 4    | 4    | 4    | 4,00      | 4,00      | 0,00   | 4,00       | 100% |  |  |
| 3.1.2                                        | Analysis of effectiveness                                                                                                  | 1-4         | 1    | 1    | 1    | 1    | 1    | 1    | 1    | 1    | 1,00      | 1,00      | 0,00   | 1,00       | 25%  |  |  |
| 3.1.3                                        | Estimated cost                                                                                                             | 1-4         | 1    | 1    | 1    | 1    | 1    | 1    | 1    | 1    | 1,00      | 1,00      | 0,00   | 1,00       | 25%  |  |  |
| 3.1.4                                        | Relationship of measures and Phases                                                                                        | 1-4         | 4    | 4    | 4    | 4    | 4    | 4    | 4    | 4    | 4,00      | 4,00      | 0,00   | 4,00       | 100% |  |  |
| 3.1.5                                        | Mechanism of progress implementation                                                                                       | 1-4         | 4    | 4    | 4    | 4    | 4    | 4    | 4    | 4    | 4,00      | 4,00      | 0,00   | 4,00       | 100% |  |  |
| 3.1.6                                        | Relationship with other plans                                                                                              | Mean        | 2,00 | 2,00 | 2,00 | 2,00 | 2,00 | 2,00 | 2,00 | 2,00 | 2,00      | 2,00      | 0,00   | 2,00       | 50%  |  |  |
|                                              | Relationship between DMP and EP                                                                                            | 1-4         | 3    | 3    | 3    | 3    | 3    | 3    | 3    | 3    | 3,00      | 3,00      | 0,00   | 3,00       | 75%  |  |  |
|                                              | Drought measures included in other plans or strategies (DMPs, National, Regional, etc.)                                    | 1-4         | 1    | 1    | 1    | 1    | 1    | 1    | 1    | 1    | 1,00      | 1,00      | 0,00   | 1,00       | 25%  |  |  |
| 3.2                                          | Drought management and coordination                                                                                        | Mean        | 3,20 | 3,20 | 3,20 | 3,20 | 3,20 | 3,20 | 3,20 | 3,20 | 3,20      | 3,20      | 0,00   | 3,20       | 80%  |  |  |
| 3.2.1                                        | Plan foundation and legal aspects                                                                                          | 1-4         | 2    | 2    | 2    | 2    | 2    | 2    | 2    | 2    | 2,00      | 2,00      | 0,00   | 2,00       | 50%  |  |  |
| 3.2.2                                        | Establishment of responsibilities                                                                                          | Mean        | 3,67 | 3,67 | 3,67 | 3,67 | 3,67 | 3,67 | 3,67 | 3,67 | 3,67      | 3,67      | 0,00   | 3,67       | 92%  |  |  |
|                                              | Establishment of responsibilities for the drought task force                                                               | 1-4         | 4    | 4    | 4    | 4    | 4    | 4    | 4    | 4    | 4,00      | 4,00      | 0,00   | 4,00       | 100% |  |  |
|                                              | Establish clear responsibilities for the drought task force                                                                | 1-4         | 3    | 3    | 3    | 3    | 3    | 3    | 3    | 3    | 3,00      | 3,00      | 0,00   | 3,00       | 75%  |  |  |
|                                              | Establish clear responsibilities for the drought task force                                                                | 1-4         | 4    | 4    | 4    | 4    | 4    | 4    | 4    | 4    | 4,00      | 4,00      | 0,00   | 4,00       | 100% |  |  |
| 3.2.3                                        | Identify the responsible for the drought task force                                                                        | 1-4         | 3    | 3    | 3    | 3    | 3    | 3    | 3    | 3    | 3,00      | 3,00      | 0,00   | 3,00       | 75%  |  |  |
| 3.3                                          | Communication and Participation                                                                                            | Mean        | 3,00 | 3,00 | 3,00 | 3,00 | 3,00 | 3,00 | 3,00 | 3,00 | 3,00      | 3,00      | 0,00   | 3,00       | 75%  |  |  |
| 3.3.1                                        | Promotion of dissemination and communication                                                                               | Mean        | 3,00 | 3,00 | 3,00 | 3,00 | 3,00 | 3,00 | 3,00 | 3,00 | 3,00      | 3,00      | 0,00   | 3,00       | 75%  |  |  |
|                                              | Identify the responsible for the communication of the DMP                                                                  | 1-4         | 2    | 2    | 2    | 2    | 2    | 2    | 2    | 2    | 2,00      | 2,00      | 0,00   | 2,00       | 50%  |  |  |
|                                              | Establish different means and mechanisms                                                                                   | 1-4         | 4    | 4    | 4    | 4    | 4    | 4    | 4    | 4    | 4,00      | 4,00      | 0,00   | 4,00       | 100% |  |  |
| 3.3.2                                        | Promotion of public participation                                                                                          | Mean        | 3,00 | 3,00 | 3,00 | 3,00 | 3,00 | 3,00 | 3,00 | 3,00 | 3,00      | 3,00      | 0,00   | 3,00       | 75%  |  |  |
|                                              | Responsible to promote and manage public participation                                                                     | 1-4         | 2    | 2    | 2    | 2    | 2    | 2    | 2    | 2    | 2,00      | 2,00      | 0,00   | 2,00       | 50%  |  |  |
|                                              | Establish clear mechanisms or Describe the participation process and the results                                           | 1-4         | 4    | 4    | 4    | 4    | 4    | 4    | 4    | 4    | 4,00      | 4,00      | 0,00   | 4,00       | 100% |  |  |
| 3.4                                          | Establish DMP Follow-up                                                                                                    | Mean        | 2,83 | 2,83 | 2,83 | 2,83 | 2,83 | 2,83 | 2,83 | 2,83 | 2,83      | 2,83      | 0,00   | 2,83       | 71%  |  |  |
| 3.4.1                                        | Identification and description of follow-up indicators and tools                                                           | Mean        | 2,50 | 2,50 | 2,50 | 2,50 | 2,50 | 2,50 | 2,50 | 2,50 | 2,50      | 2,50      | 0,00   | 2,50       | 63%  |  |  |
|                                              | Follow-up indicators                                                                                                       | 1-4         | 4    | 4    | 4    | 4    | 4    | 4    | 4    | 4    | 4,00      | 4,00      | 0,00   | 4,00       | 100% |  |  |
|                                              | Follow-up tools                                                                                                            | 1-4         | 1    | 1    | 1    | 1    | 1    | 1    | 1    | 1    | 1,00      | 1,00      | 0,00   | 1,00       | 25%  |  |  |
| 3.4.2                                        | Ex post assessment                                                                                                         | 1-4         | 3    | 3    | 3    | 3    | 3    | 3    | 3    | 3    | 3,00      | 3,00      | 0,00   | 3,00       | 75%  |  |  |
| 3.4.3                                        | Plan revision process                                                                                                      | 1-4         | 3    | 3    | 3    | 3    | 3    | 3    | 3    | 3    | 3,00      | 3,00      | 0,00   | 3,00       | 75%  |  |  |
|                                              | Mean                                                                                                                       | Mean        | 3,19 | 2,84 | 3,04 | 3,14 | 3,16 | 2,82 | 3,23 | 2,93 | 2,82      | 3,23      | 0,16   | 3,04       | 76%  |  |  |
